# Supplementary material for: Construction and analyses of the microRNA-target gene differential regulatory network in thyroid carcinoma
Source: PubMed Central journal article supplement (PMC5453480; doi:10.1371/journal.pone.0178331), 2017-06-01

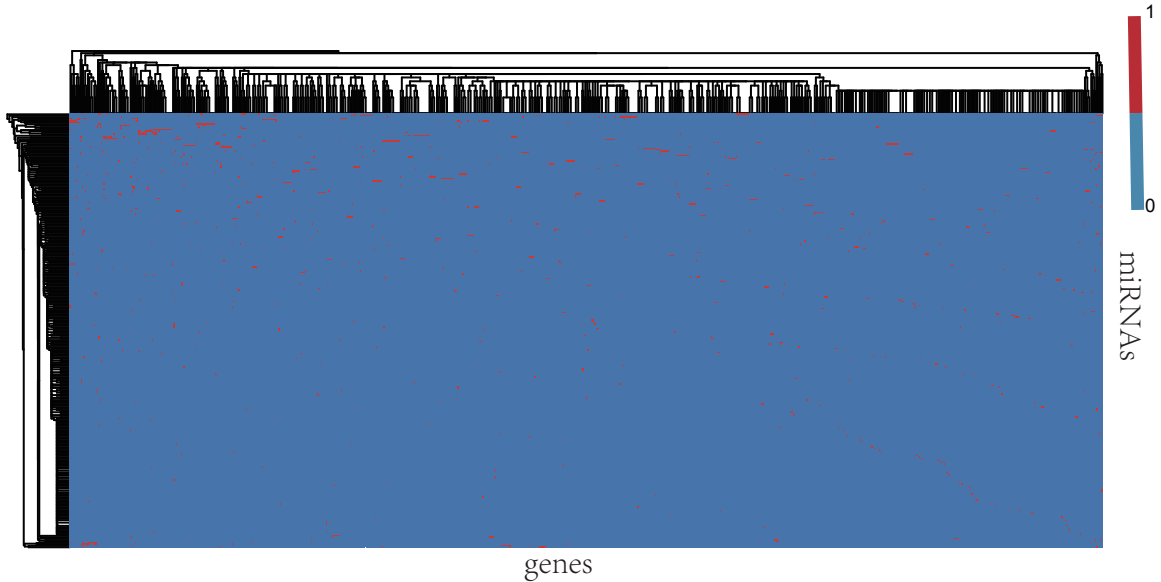

Supplement: pone.0178331.s001.pdf [file pone.0178331.s001.pdf]
